# Supplementary material for: Rainfall changes perceived by farmers and captured by meteorological data: two sides to every story
Source: Springer Nature journal article supplement (doi:10.1007/s10113-023-02064-9), 2023-05-25

**Appendix**

Decadal change in CV by index for all kebele groups. Note: the last timestep consists of only seven years


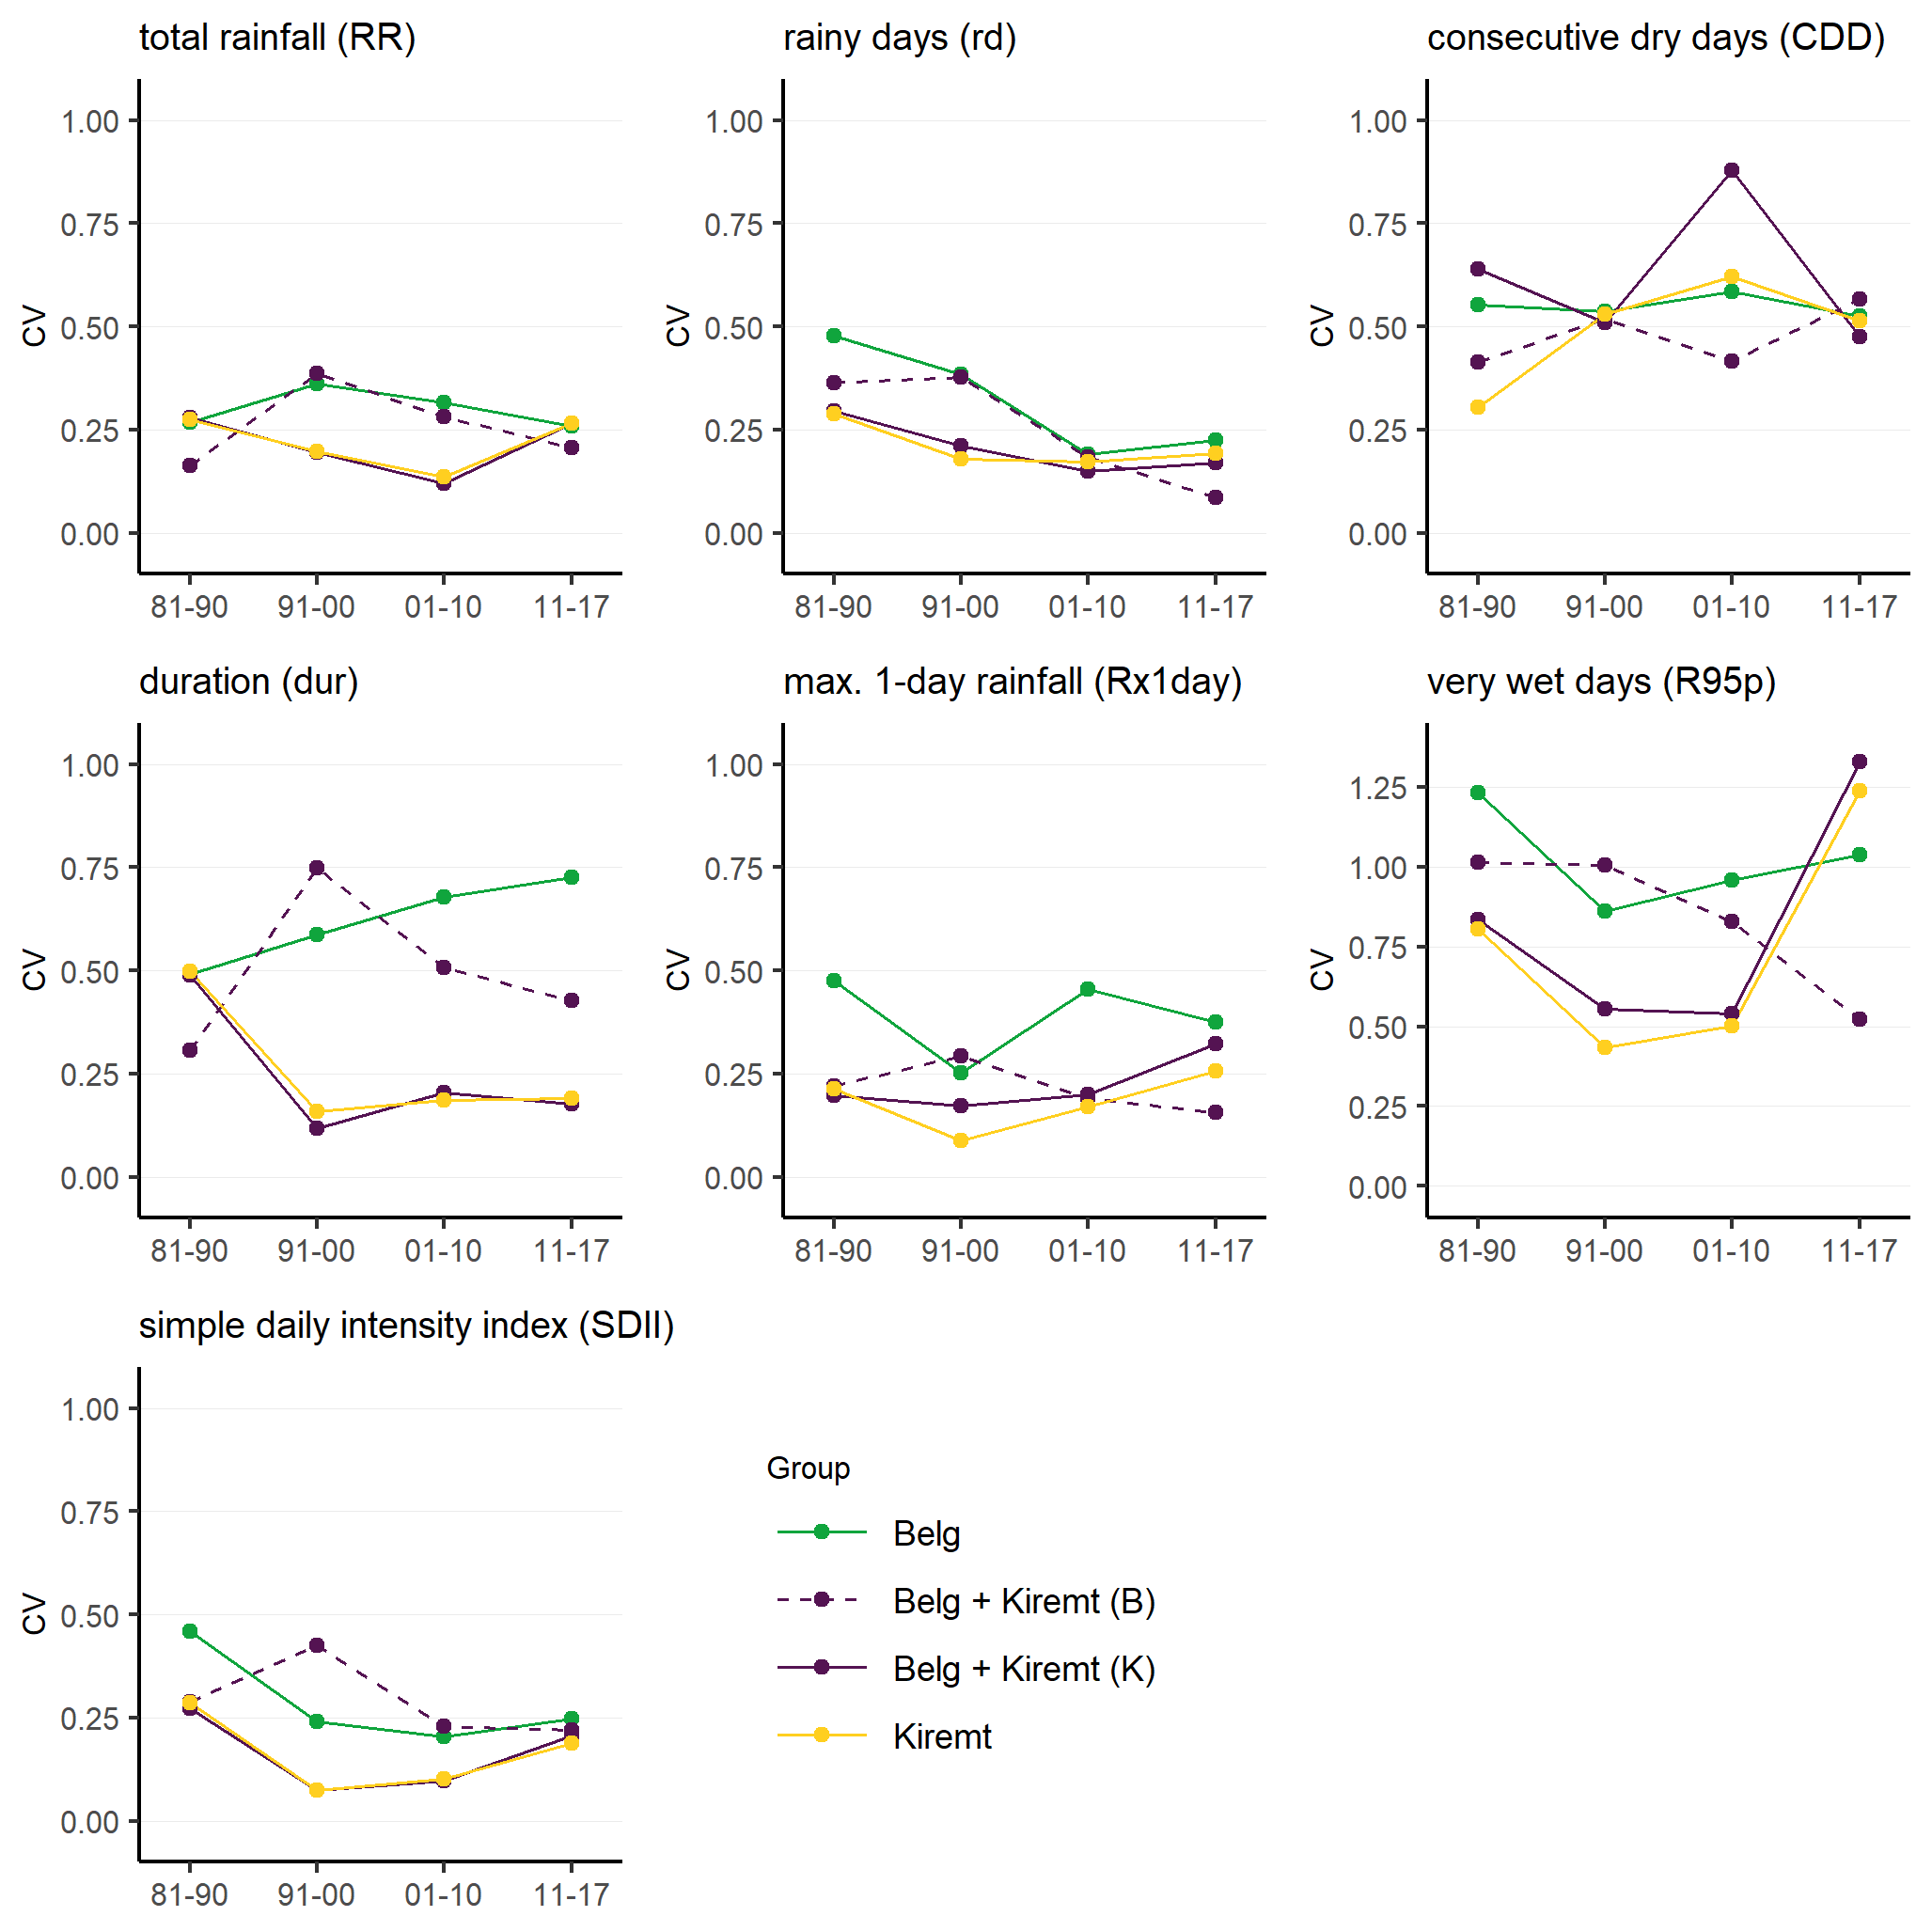

Supplement: MOESM1 [file 10113_2023_2064_MOESM1_ESM.docx]
